# Supplementary material for: Preadmission Statin Prescription and Inpatient Myocardial Infarction in Geriatric Hip Fracture
Source: MDPI journal article supplement (doi:10.3390/jcm10112441), 2021-05-31
Supplement: s1 [file s1]

**Supplement Table S1.** Demographic and disease-related characteristics adjusted with Propensity Weighting.

| Characteristic                        | Crude     |           | <i>p</i> -Value | Weighted  |           | <i>p</i> -Value |
|---------------------------------------|-----------|-----------|-----------------|-----------|-----------|-----------------|
|                                       | No Statin | Statin    |                 | No Statin | Statin    |                 |
| Age (yrs; mean, SD)                   | 85 (8)    | 82 (7)    | <0.001          | 84 (8)    | 84 (7)    | 0.521           |
| Sex (Female; <i>n</i> , %)            | 551 (71%) | 257 (66%) | 0.061           | 528 (70%) | 232 (67%) | 0.352           |
| Type ( <i>n</i> , %)                  |           |           |                 |           |           |                 |
| Atorvastatin                          |           | 184 (74%) |                 |           | 143 (43%) |                 |
| Simvastatin                           |           | 91 (23%)  |                 |           | 101 (30%) |                 |
| Rosuvastatin                          |           | 87 (22%)  |                 |           | 68 (20%)  |                 |
| Pravastatin                           |           | 27 (6.9%) |                 |           | 22 (6.6%) |                 |
| Surgery Performed (yes; <i>n</i> , %) | 758 (98%) | 382 (98%) | 0.906           | 753 (99%) | 382 (98%) | 0.457           |
| CCI (mean, SD)                        | 6 (2)     | 7 (2)     | 0.357           | 7 (3)     | 7 (2)     | 0.210           |
| ASA grade (mean, SD)                  |           |           | 0.169           |           |           | 0.362           |
| 1                                     | 7 (0.9%)  | 0 (0%)    |                 | 6 (0.7%)  | 0 (0%)    |                 |
| 2                                     | 110 (14%) | 64 (17%)  |                 | 102 (14%) | 43 (12%)  |                 |
| 3                                     | 439 (58%) | 229 (60%) |                 | 436 (58%) | 198 (57%) |                 |
| 4                                     | 203 (27%) | 88 (27%)  |                 | 212 (28%) | 103 (30%) |                 |
| 5                                     | 2 (0.3%)  | 2 (0.5%)  |                 | 2 (0.2%)  | 2 (0.7%)  |                 |
| RCRI (median, range)                  |           |           | <0.001          |           |           | 0.016           |
| 0                                     | 438 (57%) | 132 (34%) |                 | 364 (48%) | 140 (40%) |                 |
| 1                                     | 216 (28%) | 144 (37%) |                 | 228 (30%) | 128 (37%) |                 |
| 2                                     | 93 (12%)  | 70 (18%)  |                 | 101 (13%) | 53 (15%)  |                 |
| 3                                     | 21 (2.7%) | 36 (9.2%) |                 | 37 (4.8%) | 23 (6.5%) |                 |
| 4                                     | 6 (0.8%)  | 8 (2.0%)  |                 | 28 (3.7%) | 4 (1.1%)  |                 |
| 5                                     | 1 (0.1%)  | 1 (0.3%)  |                 | 1 (0.1%)  | 1 (0.1%)  |                 |
| Cardiac-related Comorbidity           |           |           |                 |           |           |                 |
| Ischaemic Heart Disease               | 160 (21%) | 157 (40%) | <0.001          | 217 (29%) | 117 (34%) | 0.077           |
| Congestive Cardiac Failure            | 115 (15%) | 59 (15%)  | 0.910           | 142 (19%) | 54 (16%)  | 0.194           |
| Cerebrovascular Disease               | 216 (28%) | 155 (40%) | <0.001          | 243 (32%) | 113 (33%) | 0.857           |
| Hypertension                          | 451 (58%) | 280 (72%) | <0.001          | 472 (62%) | 230 (66%) | 0.204           |
| Peripheral Vascular Disease           | 45 (5.8%) | 35 (9.0%) | 0.045           | 43 (5.6%) | 25 (7.3%) | 0.302           |
| Previous Acute Pulmonary Oedema       | 37 (4.8%) | 41 (10%)  | <0.001          | 51 (6.7%) | 25 (7.3%) | 0.730           |
| Existing Atrial Fibrillation          | 215 (19%) | 5 (16%)   | 0.503           | 156 (21%) | 63 (18%)  | 0.329           |
| Valvular heart disease                | 25 (3.2%) | 14 (3.6%) | 0.750           | 25 (3.3%) | 10 (3.0%) | 0.772           |
| Prosthetic valve                      | 6 (0.8%)  | 7 (1.8%)  | 0.119           | 5 (0.7%)  | 5 (1.4%)  | 0.284           |
| Aortic aneurysm                       | 18 (2.3%) | 19 (4.9%) | 0.020           | 21 (2.7%) | 12 (3.4%) | 0.571           |
| Pacemaker                             | 23 (3.0%) | 15 (3.8%) | 0.430           | 21 (2.7%) | 17 (5.0%) | 0.056           |
| Non-cardiac Comorbidity               |           |           |                 |           |           |                 |
| Chronic Renal Failure                 | 81 (10%)  | 69 (18%)  | <0.001          | 114 (15%) | 50 (14%)  | 0.752           |
| Diabetes Mellitus                     | 104 (13%) | 116 (30%) | <0.001          | 158 (21%) | 74 (21%)  | 0.839           |

|                                         |           |           |        |           |           |        |
|-----------------------------------------|-----------|-----------|--------|-----------|-----------|--------|
| Gastro-oesophageal Reflux Disease       | 215 (28%) | 134 (34%) | 0.022  | 214 (28%) | 109 (32%) | 0.253  |
| Chronic Obstructive Pulmonary Disease   | 117 (15%) | 62 (16%)  | 0.734  | 111 (15%) | 53 (15%)  | 0.761  |
| Malignancy                              | 153 (19%) | 71 (18%)  | 0.517  | 137 (18%) | 77 (22%)  | 0.109  |
| Dementia                                | 235 (30%) | 82 (21%)  | <0.001 | 225 (30%) | 105 (30%) | 0.854  |
| Hypercholesterolaemia                   | 67 (8.6%) | 210 (54%) | <0.001 | 182 (24%) | 92 (27%)  | 0.368  |
| Medications                             |           |           |        |           |           |        |
| Antiplatelets                           | 235 (30%) | 223 (57%) | <0.001 | 303 (40%) | 158 (45%) | 0.090  |
| Beta blocker                            | 188 (24%) | 169 (43%) | <0.001 | 230 (30%) | 123 (35%) | 0.097  |
| Calcium channel blocker                 | 100 (13%) | 86 (22%)  | <0.001 | 104 (14%) | 75 (22%)  | <0.001 |
| Angiotensin converting enzyme inhibitor | 91 (12%)  | 122 (31%) | <0.001 | 170 (22%) | 108 (31%) | <0.001 |
| Angiotensin Receptor Blocker            | 91 (12%)  | 79 (20%)  | <0.001 | 102 (13%) | 56 (16%)  | 0.240  |
| Furosemide                              | 195 (25%) | 111 (28%) | 0.237  | 220 (29%) | 111 (28%) | 0.237  |
| Spirolactone                            | 50 (6.5%) | 39 (10%)  | 0.032  | 65 (8.6%) | 23 (6.6%) | 0.255  |
| Ezetimibe                               | 7 (0.9%)  | 6 (1.5%)  | 0.332  | 14 (1.9%) | 3 (0.9%)  | 0.195  |
| Nitrovasodilators                       | 124 (16%) | 73 (19%)  | 0.251  | 117 (15%) | 80 (23%)  | <0.001 |
| NSAID                                   | 23 (3.0%) | 9 (2.3%)  | 0.511  | 26 (3.5%) | 14 (3.9%) | 0.722  |
| Corticosteroids                         | 59 (7.6%) | 18 (4.6%) | 0.051  | 61 (8.0%) | 10 (3.0%) | <0.001 |

ASA- American Society of Anesthesiologists, CCI- Charlson Comorbidity Index, NSAID- non-steroidal anti-inflammatory drug, RCRI- Revised Cardiac Risk Index.
